# Supplementary material
Source: publisher figshare collection journal article supplement (https://tandf.figshare.com/ndownloader/files/14244410)
Supplement: Supplementary file 1 [file 14244410]

Dear all,

I tried to upload the video but reached the allowed file size (the size is 15MB). I cannot reduce it into a smaller version. Therefore, I uploaded it here: <https://www.dropbox.com/sh/rh055evi0zoc4xw/AAAzgOkbuW_Q8K3yavPxKIvha?dl=0>

However, if it is possible, I can also send the video via mail.

Thank you and sincerely,

Barbara Frank
